# Supplementary material for: HDAC8 Activates AKT through Upregulating PLCB1 and Suppressing DESC1 Expression in MEK1/2 Inhibition-Resistant Cells
Source: MDPI journal article supplement (doi:10.3390/cells10051101), 2021-05-04
Supplement: s1 [file s1]

**Supplemental Table S1:** HT-29 cells were cultured with or without LT (500 ng/mL of each PA & LF) together or without PCI-34051 (PCI: 5  $\mu$ M) for 48 h. Total cellular RNAs were isolated using TRIzol™ (Ambion by Life Technologies) and microarray was performed once using the GeneChip™ Human Genome U133 Plus 2.0 Array kit in the London Regional Genomics Centre (Robarts Research Institute in Western University, London, Ontario, CANADA). Gene ontology enrichment analysis was performed, and the top 10 gene ontology enrichment processes are provided.

| function                   | type               | Enrichment Score | Enrichment p-value |
|----------------------------|--------------------|------------------|--------------------|
| cell cycle process         | biological process | 101.293          | 1.02E-44           |
| mitotic cell cycle process | biological process | 95.3211          | 4.00E-42           |
| chromosomal part           | cellular component | 56.3199          | 3.47E-25           |
| chromosome organization    | biological process | 56.238           | 3.77E-25           |
| cell division              | biological process | 51.2036          | 5.79E-23           |
| nuclear part               | cellular component | 51.1509          | 6.10E-23           |
| nuclear division           | biological process | 48.3014          | 1.05E-21           |
| organelle fission          | biological process | 47.889           | 1.59E-21           |
| nucleoplasm                | cellular component | 46.0864          | 9.66E-21           |
| mitotic nuclear division   | biological process | 45.5635          | 1.63E-20           |

**Supplemental Table S2:** HT-29 cells were cultured with or without LT (500 ng/mL of each PA & LF) together or without PCI-34051 (PCI: 5  $\mu$ M) for 48 h. Total cellular RNAs were isolated using TRIzol™ (Ambion by Life Technologies) and microarray was performed once using the GeneChip™ Human Genome U133 Plus 2.0 Array kit in the London Regional Genomics Centre (Robarts Research Institute in Western University, London, Ontario, CANADA). Gene ontology enrichment analysis was performed, and the list of cell cycle progress-related genes changed more than 2-fold by LT or LT+PCI is provided. Highlighted genes are upregulated genes.

| Gene Symbol | RefSeq       | Ratio(PCI+LT vs. CNT) | Ratio(LT vs. CNT) |
|-------------|--------------|-----------------------|-------------------|
| RCC1        | NM_001048194 | 0.285876              | 0.347751          |
| CDCA8       | NM_001256875 | 0.301431              | 0.364432          |
| CDC20       | NM_001255    | 0.202838              | 0.276023          |
| KIF2C       | NM_001297655 | 0.28741               | 0.412851          |
| CDC7        | NM_001134419 | 0.271888              | 0.365027          |
| DCLRE1B     | NM_022836    | 0.380033              | 0.461885          |
| CKS1B       | NM_001826    | 0.41233               | 0.457933          |

|         |              |          |          |
|---------|--------------|----------|----------|
| NUF2    | NM_031423    | 0.366352 | 0.426331 |
| RGS2    | NM_002923    | 3.88544  | 3.06834  |
| CENPF   | NM_016343    | 0.370479 | 0.496498 |
| ORC1    | NM_001190818 | 0.408114 | 0.376708 |
| IQGAP3  | NM_178229    | 0.260466 | 0.363813 |
| CENPL   | NM_001127181 | 0.426725 | 0.534419 |
| NEK2    | NM_001204182 | 0.361652 | 0.358897 |
| LIN9    | NM_001270409 | 0.480212 | 0.558611 |
| MCM10   | NM_018518    | 0.144166 | 0.186486 |
| MASTL   | NM_001172303 | 0.49245  | 0.547641 |
| CDK1    | NM_001170406 | 0.278212 | 0.276161 |
| ZWINT   | NM_001005413 | 0.351716 | 0.391994 |
| DNA2    | NM_001080449 | 0.424627 | 0.536792 |
| RRM1    | NM_001033    | 0.454654 | 0.510663 |
| FEN1    | NM_004111    | 0.288035 | 0.32096  |
| INCENP  | NM_001040694 | 0.499674 | 0.557029 |
| POLA2   | NM_002689    | 0.391034 | 0.51125  |
| KIF18A  | NM_031217    | 0.28319  | 0.300318 |
| NCAPD3  | NM_015261    | 0.387565 | 0.412933 |
| CDK2    | NM_001290230 | 0.436831 | 0.517071 |
| GAS2L3  | NM_001303130 | 0.478251 | 0.485105 |
| RFC5    | NM_001130112 | 0.342727 | 0.421122 |
| KNTC1   | NM_014708    | 0.453629 | 0.525736 |
| FOXM1   | NM_001243088 | 0.197949 | 0.251364 |
| PRIM1   | NM_000946    | 0.390216 | 0.435871 |
| APPL2   | NM_001251904 | 2.37824  | 2.37824  |
| POLE    | NM_006231    | 0.489848 | 0.497844 |
| RFC3    | NM_002915    | 0.260031 | 0.292599 |
| BORA    | NM_001286746 | 0.41994  | 0.400214 |
| CAB39L  | NM_001079670 | 2.87853  | 2.8948   |
| CDKN3   | NM_001130851 | 0.237862 | 0.334401 |
| VRK1    | NM_003384    | 0.438171 | 0.473009 |
| POLE2   | NM_001197330 | 0.301611 | 0.297033 |
| CASC5   | NM_144508    | 0.363149 | 0.45838  |
| HAUS2   | NM_001130447 | 0.498951 | 0.507016 |
| TUBGCP4 | NM_001286414 | 0.434634 | 0.503921 |
| CCNB2   | NM_004701    | 0.249617 | 0.363116 |
| ZWILCH  | NM_001287821 | 0.286499 | 0.368202 |
| KIF23   | NM_001281301 | 0.316464 | 0.379613 |
| TICRR   | NM_001308025 | 0.287843 | 0.293981 |
| CEP152  | NM_001194998 | 0.482835 | 0.513506 |
| CEP152  | XM_011521374 | 0.481679 | 0.617719 |
| CCNF    | NM_001761    | 0.399187 | 0.472933 |

|         |              |          |          |
|---------|--------------|----------|----------|
| PLK1    | NM_005030    | 0.197139 | 0.279959 |
| ORC6    | NM_014321    | 0.270574 | 0.331146 |
| NUP93   | NM_001242795 | 0.472603 | 0.503651 |
| GIN53   | NM_001126129 | 0.405069 | 0.527388 |
| CENPN   | NM_001100624 | 0.272596 | 0.317246 |
| CDT1    | NM_030928    | 0.301236 | 0.380926 |
| GIN52   | NM_016095    | 0.238456 | 0.238456 |
| TUBG1   | NM_001070    | 0.399215 | 0.416582 |
| PRR11   | NM_018304    | 0.199637 | 0.326401 |
| BIRC5   | NM_001012270 | 0.311819 | 0.311819 |
| AURKB   | NM_001256834 | 0.271242 | 0.344244 |
| TOP2A   | NM_001067    | 0.3539   | 0.441185 |
| PSMC3IP | NM_001256014 | 0.402091 | 0.462407 |
| TYMS    | NM_001071    | 0.177862 | 0.259221 |
| SEH1L   | NM_001013437 | 0.368324 | 0.419993 |
| RBBP8   | NM_002894    | 0.498317 | 0.451902 |
| SKA1    | NM_001039535 | 0.282695 | 0.340353 |
| CCNE1   | NM_001238    | 0.342748 | 0.34046  |
| PDCD2L  | NM_032346    | 0.460542 | 0.535774 |
| SPC24   | NM_182513    | 0.303056 | 0.377067 |
| RRM2    | NM_001034    | 0.300244 | 0.34095  |
| CENPA   | NM_001042426 | 0.468281 | 0.586728 |
| RPS27A  | NM_001135592 | 0.445488 | 0.614994 |
| NCAPH   | NM_001281710 | 0.224695 | 0.283091 |
| PPM1G   | NM_177983    | 0.443257 | 0.525855 |
| BUB1    | NM_001278616 | 0.227497 | 0.3303   |
| MCM6    | NM_005915    | 0.320284 | 0.352843 |
| SPC25   | NM_020675    | 0.315408 | 0.381822 |
| HJURP   | NM_001282962 | 0.371331 | 0.432026 |
| MCM8    | NM_001281520 | 0.427451 | 0.493156 |
| PLCB1   | NM_015192    | 2.97299  | 4.1232   |
| GIN51   | NM_021067    | 0.276277 | 0.369938 |
| MYBL2   | NM_001278610 | 0.229278 | 0.295507 |
| UBE2C   | NM_001281741 | 0.304198 | 0.328864 |
| PCNA    | NM_002592    | 0.261789 | 0.309554 |
| E2F1    | NM_005225    | 0.295804 | 0.299625 |
| RBL1    | NM_002895    | 0.45033  | 0.484462 |
| AURKA   | NM_003600    | 0.342102 | 0.379798 |
| CDC45   | NM_001178010 | 0.309178 | 0.33773  |
| MCM5    | NM_006739    | 0.227065 | 0.292042 |
| GTSE1   | NM_016426    | 0.322018 | 0.412089 |
| RANGAP1 | NM_001278651 | 0.467146 | 0.668615 |
| CENPM   | NM_001002876 | 0.402886 | 0.422057 |

|          |              |          |          |
|----------|--------------|----------|----------|
| MCM2     | NM_004526    | 0.334439 | 0.39631  |
| SMC4     | NM_001002800 | 0.317317 | 0.380391 |
| SGOL1    | NM_001012409 | 0.244391 | 0.321495 |
| CDC25A   | NM_001789    | 0.26076  | 0.240049 |
| NCAPG    | NM_022346    | 0.182977 | 0.283118 |
| CCNG2    | NM_004354    | 2.18542  | 2.18542  |
| PLK4     | NM_001190799 | 0.330495 | 0.382655 |
| MND1     | NM_001253861 | 0.268424 | 0.334273 |
| PPAT     | NM_002703    | 0.364533 | 0.368884 |
| CENPE    | NM_001286734 | 0.32225  | 0.44794  |
| MAD2L1   | NM_002358    | 0.214296 | 0.311943 |
| CCNA2    | NM_001237    | 0.188092 | 0.259087 |
| CENPU    | NM_024629    | 0.449788 | 0.449788 |
| PELO     | NM_015946    | 2.00204  | 2.00204  |
| CCNB1    | NM_031966    | 0.192794 | 0.269016 |
| CENPH    | NM_022909    | 0.403698 | 0.430568 |
| KIF20A   | NM_005733    | 0.400406 | 0.445795 |
| NUP155   | NM_001278312 | 0.482291 | 0.521369 |
| CENPK    | NM_001267038 | 0.243588 | 0.284678 |
| CDC25C   | NM_001287582 | 0.48917  | 0.516851 |
| GMNN     | NM_001251989 | 0.379135 | 0.470974 |
| HIST1H4C | NM_003542    | 0.449769 | 0.482229 |
| CENPQ    | NM_018132    | 0.439105 | 0.526422 |
| CENPW    | NM_001012507 | 0.247306 | 0.326343 |
| HIST1H4L | NM_003546    | 0.312235 | 0.3152   |
| MCM3     | NM_001270472 | 0.291034 | 0.324251 |
| FBXO5    | NM_001142522 | 0.340748 | 0.426026 |
| DBF4     | NM_006716    | 0.240242 | 0.272895 |
| AKAP9    | NM_005751    | 2.41764  | 2.42304  |
| NUP205   | NM_015135    | 0.445218 | 0.473976 |
| TBRG4    | NM_001261834 | 0.426676 | 0.508931 |
| RFC2     | NM_001278791 | 0.328773 | 0.331529 |
| MCM7     | NM_001278595 | 0.469683 | 0.605183 |
| XRCC2    | NM_005431    | 0.266924 | 0.323332 |
| NCAPG2   | NM_001281932 | 0.417351 | 0.438126 |
| ESCO2    | NM_001017420 | 0.28137  | 0.367127 |
| MCM4     | NM_005914    | 0.244048 | 0.284462 |
| MELK     | NM_001256685 | 0.261445 | 0.295467 |
| CENPP    | NM_001012267 | 0.475247 | 0.548013 |
| SMC2     | NM_001042550 | 0.468408 | 0.530469 |
| NUP188   | NM_015354    | 0.49515  | 0.597079 |
| TUBB4B   | NM_006088    | 0.494319 | 0.487004 |
| CDKN2B   | NM_004936    | 2.20441  | 1.88372  |

|         |              |          |          |
|---------|--------------|----------|----------|
| SDCCAG3 | NM_001039707 | 0.413875 | 0.545392 |
| POLA1   | NM_016937    | 0.450899 | 0.574821 |
| RRAGB   | NM_006064    | 2.0481   | 2.11187  |
| CENPI   | NM_006733    | 0.39795  | 0.475615 |
| ERCC6L  | NM_017669    | 0.474085 | 0.512131 |

**Supplemental Table S3:** HT-29 cells were cultured with or without LT (500 ng/mL of each PA & LF) together or without PCI-34051 (PCI: 5  $\mu$ M) for 48 h. Total cellular RNAs were isolated using TRIzol™ (Ambion by Life Technologies) and microarray was performed once using the GeneChip™ Human Genome U133 Plus 2.0 Array kit in the London Regional Genomics Centre (Robarts Research Institute in Western University, London, Ontario, CANADA). Gene ontology enrichment analysis was performed, and the list of tumor suppressor genes changed more than 2-fold by LT or LT+PCI is provided. Highlighted are genes upregulated by LT or LT+PCI.

|              |           | LT vs. CNT | PCI+LT vs. CNT |
|--------------|-----------|------------|----------------|
| NM_006763    | BTG2      | 6.09       | 4.3            |
| NM_004562    | PARK2     | 2.01       | 2.13           |
| NM_001423    | EMP1      | 0.32       | 0.36           |
| NM_001313972 | TXNIP     | 4          | 4.64           |
| NM_001134419 | CDC7      | 0.36       | 0.27           |
| NM_001270409 | LIN9      | 0.56       | 0.48           |
| NM_001290230 | CDK2      | 0.52       | 0.43           |
| NM_004936    | CDKN2B    | 1.88       | 2.2            |
| NM01224      | DKK1      | 0.22       | 0.18           |
| NM_001199492 | PDCD4     | 3.57       | 3.73           |
| NM_001080521 | RASSF10   | 5.05       | 5.75           |
| NM_001114121 | CHEK1     | 0.41       | 0.35           |
| NM_001003940 | BMF       | 4.35       | 4.99           |
| NM_016639    | TNFRSF12A | 0.23       | 0.2            |
| NM_002894    | RBBP8     | 0.45       | 0.5            |
| NM_001190942 | TNFRSF10  | 2.89       | 3.17           |
| NM_003897    | IER3      | 0.42       | 0.45           |
| NM_001244262 | HBP1      | 2.48       | 2.47           |
| NM_001039372 | HEPACAM   | 10.7       | 8.44           |
| NM_001135733 | TP53INP1  | 6.94       | 6.46           |
| NM_001242463 | FBXO32    | 4.39       | 3.43           |
| NM_001288729 | DAPK1     | 2.75       | 3.02           |

|           |                 |      |       |
|-----------|-----------------|------|-------|
| NM_014058 | DESC1(TMPRS11E) | 1    | 2.03  |
| NM_018191 | RCBTB1          | 2.13 | 2.098 |
